# Supplementary material
Source: Research Square preprint supplement (doi:10.21203/rs.3.rs-8823167/v1)
Supplement: Supplementary file 1 [file 43e002e458463341d9e81686.docx]

| **Sample** | **Raw reads** | **Total bases** | **GC %** | **Clean reads** | **GC %** |
| --- | --- | --- | --- | --- | --- |
| MG0_R1 | 50501154 | 7.6 Gbp | 51 | 48750769 | 51 |
| MG0_R2 | 50501154 | 7.6Gbp | 51 | 48750769 | 51 |
| MG12_R1 | 55856597 | 8.4Gbp | 47 | 53872413 | 47 |
| MG12_R2 | 55856597 | 8.4Gbp | 48 | 53872413 | 47 |
| MG24_R1 | 75014062 | 11.3Gbp | 48 | 72019885 | 48 |
| MG24_R2 | 75014062 | 11.3Gbp | 49 | 72019885 | 48 |
| MG36_R1 | 33604437 | 5 Gbp | 51 | 32773176 | 51 |
| MG36_R2 | 33604437 | 5 Gbp | 51 | 32773176 | 51 |
| MP0_R1 | 32293427 | 4.8 Gbp | 45 | 31830876 | 45 |
| MP0_R2 | 32293427 | 4.8 Gbp | 46 | 31830876 | 46 |
| MP12_R1 | 31827940 | 4.8 Gbp | 48 | 31208400 | 48 |
| MP12_R2 | 31827940 | 4.8 Gbp | 48 | 31208400 | 48 |
| MP24_R1 | 25195992 | 3.8 Gbp | 47 | 24702864 | 47 |
| MP24_R2 | 25195992 | 3.8 Gbp | 48 | 24702864 | 47 |
| MP36_R1 | 29266203 | 4.4Gbp | 44 | 28876783 | 44 |
| MP36_R2 | 29266203 | 4.4Gbp | 45 | 28876783 | 44 |

**Table 1. Summary of RNA- Seq data of MG and MP genotypes**

**Table 2. Trinity summary statistics of assembled transcripts**

| **Parameters** | **Good Rooters** | **Poor Rooters** |
| --- | --- | --- |
| Contig | 159674 | 140780 |
| Contig N50 | 2422 | 2642 |
| Contig length mean | 1306 | 1501 |
| GC content overall | 39.4 | 39.37 |
| Contig num_bp | 208607890 | 211351840 |
| Transcripts with ORF | 159291 | 140221 |
| Average ORF length | 557.9bp | 613.1bp |
| Unigenes | 94,337 | 79,103 |

| Pathway | KEGG ID | DEGs | P-value |
| --- | --- | --- | --- |
| **0/12 h -Upregulated genes** | | | |
| Plant hormone signal transduction | Ko:04075 | 9 | 3.04E-05 |
| Flavonoid biosynthesis | Ko:00941 | 3 | 5.42E-04 |
| ABC transporters | Ko:02010 | 3 | 7.18E-03 |
| Circadian rhythm - plant | Ko:04712 | 2 | 3.10E-02 |
| Flavone and flavonol biosynthesis | Ko:00944 | 1 | 4.06E-02 |
| **0/12 h -downregulated genes** | | | |
| Plant hormone signal transduction | Ko:04075 | 6 | 8.57E-05 |
| **0/24 h -Upregulated genes** | | | |
| Plant hormone signal transduction | Ko:04075 | 7 | 3.96E-04 |
| ABC transporters | Ko:02010 | 3 | 1.08E-02 |
| Flavonoid biosynthesis | Ko:00941 | 2 | 1.56E-02 |
| Flavone and flavonol biosynthesis | Ko:00944 | 1 | 4.06E-02 |
| Efferocytosis | Ko:04148 | 2 | 4.06E-02 |
| **0/24 h -downregulated genes** | | | |
| Flavonoid biosynthesis | Ko:00941 | 2 | 1.78E-02 |
| **0/36 h -Upregulated genes** | | | |
| Plant hormone signal transduction | Ko:04075 | 4 | 9.90E-03 |
| **0/36 h -Downregulated genes** | | | |
| Plant hormone signal transduction | Ko:04075 | 3 | 3.40E-02 |
| **12/24 h -Upregulated genes** | | | |
| No genes |  |  |  |
| **12/24 h -downregulated genes** | | | |
| No genes |  |  |  |
| **12/36 h -Upregulated genes** | | | |
| Plant hormone signal transduction | Ko:04075 | 5 | 1.18E-04 |
| **12/36 h -Downregulated genes** | | | |
| Plant hormone signal transduction | Ko:04075 | 3 | 7.54E-03 |
| **24/36 h -Upregulated genes** | | | |
| No genes |  |  |  |
| **24/36 h -Downregulated genes** | | | |
| Plant hormone signal transduction | Ko:04075 | 2 | 3.47E-02 |
| Autophagy - other | Ko:04136 | 1 | 4.61E-02 |

**Table 3a. List of significantly enriched pathways for auxin related genes (P-value ≤0.05) in MG**

**Table 3b. List of significantly enriched pathways for auxin related genes (P-value ≤0.05) in poor rooters**

| **Pathway** | **KEGG ID** | **DEGs** | **P-value** |
| --- | --- | --- | --- |
| **0/12 h -Upregulated genes** | | | |
| Plant hormone signal transduction | Ko:04075 | 8 | 7.34E-05 |
| Flavonoid biosynthesis | Ko:00941 | 2 | 3.83E-02 |
| Phenylalanine metabolism | Ko:00360 | 2 | 4.41E-02 |
| **0/12 h -downregulated genes** | | | |
| Plant hormone signal transduction | Ko:04075 | 5 | 1.22E-02 |
| **0/24 h -Upregulated genes** | | | |
| Plant hormone signal transduction | Ko:04075 | 4 | 1.28E-04 |
| **0/24 h -downregulated genes** | | | |
| ABC transporters | Ko:02010 | 1 | 2.57E-02 |
| **0/36 h -Upregulated genes** | | | |
| Plant hormone signal transduction | Ko:04075 | 4 | 1.28E-04 |
| **0/36 h -Downregulated genes** | | | |
| ABC transporters | Ko:02010 | 1 | 2.57E-02 |
| **12/24 h -Upregulated genes** | | | |
| Plant hormone signal transduction | Ko:04075 | 2 | 2.61E-02 |
| **12/24 h -downregulated genes** | | | |
| ABC transporters | Ko:02010 | 1 | 2.57E-02 |
| **12/36 h -Upregulated genes** | | | |
| Plant hormone signal transduction | Ko:04075 | 2 | 2.61E-02 |
| **12/36 h -Downregulated genes** | | | |
| no genes |  |  |  |
| **24/36 h -Upregulated genes** | | | |
| ABC transporters | Ko:02010 | 1 | 2.57E-02 |
| **24/36 h -Downregulated genes** | | | |
| ABC transporters | Ko:02010 | 1 | 2.57E-02 |
