# Supplementary material
Source: Research Square preprint supplement (doi:10.21203/rs.3.rs-8823167/v1)
Supplement: Supplementary file 2 [file 90b8ff3b493f97c4d753a2fa.xlsx]

## Sheet: 1
Supplementary Table 1. Top 20 enriched pathways of MG and MP unigenes
Pathways	MP		Pathways	MG
ko01100 Metabolic pathway	1939		ko01100 Metabolic pathways	2338
ko01110 Biosynthesis of secodary metabolites	1068		ko01110 Biosynthesis of secondary metabolites	1229
ko03010 Ribosome	311		ko03010 Ribosome	349
ko04075 Plant hormone signal transduction	294		ko04075 Plant hormone signal transduction	309
ko01200 Carbon metabolism	240		ko01200 Carbon metabolism	271
ko01230Biosynthesis of amino acids	203		ko01230 Biosynthesis of amino acids	244
ko04626 Plant-pathogen interaction	196		ko01240 Biosynthesis of cofactors	234
ko01240 Biosynthesis of cofactors	192		ko04141 Protein processing in endoplasmic reticulum	219
ko04141 Protein processing in endoplasmic reticulum	184		ko04626 Plant pathogen interaction	203
ko00500 Starch and sucrose metabolism	170		ko03040 Spliceosome	190
ko00190 Oxidative phosphorylation	136		ko00500 Starch and sucrose metabolism	172
ko04120 Ubiquitin mediated proteolysis	132		ko00190 Oxidative phosphorylation	164
ko03040 Spliceosome	130		ko04120 Ubiquitin mediated proteolysis	160
ko04144 Endocytosis	128		ko04144 Endocytosis	157
ko00940 Phenylpropanoid biosynthesis	116		ko00520 Amino sugar and nucleotide sugar metabolism	133
ko00520 Amino sugar and nucleotide sugar metabolism	116		ko04016 MAPK signaling pkoway - plant	126
ko00010 Glycolysis/Gluconeogenesis	115		ko00270 Cysteine and methionine metabolism	123
ko04016 MAPK signalling pkoway-plant	112		ko00940 Phenylpropanoid biosynthesis	122
ko00270 Cysteine and methionine metabolism	107		ko00010 Glycolysis / Gluconeogenesis	119
ko00040 Pentose and glucuronate interconversions	104		ko03015 mRNA surveillance pkoway	117

## Sheet: 2
Supplementary table 2. COG category distribution of MG and MP unigenes
COG Categories Distribution- MG			COG Categories Distribution-MP
Function unknown (S)	1258		Function unknown (S)	1512
Signal transduction mechanisms (T)	343		Signal transduction mechanisms (T)	423
Replication, recombination and repair (L)	305		Replication, recombination and repair (L)	393
Posttranslational modification, protein turnover, chaperones (O)	256		Posttranslational modification, protein turnover, chaperones (O)	349
Transcription (K)	270		Transcription (K)	324
Carbohydrate transport and metabolism (G)	163		Carbohydrate transport and metabolism (G)	234
Amino acid transport and metabolism (E)	211		Amino acid transport and metabolism (E)	206
Translation, ribosomal structure and biogenesis (J)	176		Translation, ribosomal structure and biogenesis (J)	198
Energy production and conversion (C)	166		Energy production and conversion (C)	196
Secondary metabolites biosynthesis, transport and catabolism (Q)	141		Secondary metabolites biosynthesis, transport and catabolism (Q)	177
Inorganic ion transport and metabolism (P)	140		Inorganic ion transport and metabolism (P)	158
RNA processing and modification (A)	83		RNA processing and modification (A)	155
Intracellular trafficking, secretion, and vesicular transport (U)	97		Intracellular trafficking, secretion, and vesicular transport (U)	147
Lipid transport and metabolism (I)	110		Lipid transport and metabolism (I)	137
Cell wall/membrane/envelope biogenesis (M)	113		Cell wall/membrane/envelope biogenesis (M)	111
Coenzyme transport and metabolism (H)	95		Coenzyme transport and metabolism (H)	92
Defense mechanisms (V)	65		Defense mechanisms (V)	84
Nucleotide transport and metabolism (F)	53		Nucleotide transport and metabolism (F)	56
Cell cycle control, cell division, chromosome partitioning (D)	34		Cell cycle control, cell division, chromosome partitioning (D)	50
Chromatin structure and dynamics (B)	19		Chromatin structure and dynamics (B)	44
Cytoskeleton (Z)	32		Cytoskeleton (Z)	43
Cell motility (N)	19		Cell motility (N)	6
Nuclear structure (Y)	2		Nuclear structure (Y)	3
Extracellular structures (W)	2		Extracellular structures (W)	2
General function prediction only (R)	0		General function prediction only (R)	0

## Sheet: 3
Supplementary Table 3. Gene Ontology (GO) classification of MP and MG unigenes
MG						MP
GO_acc	term_type	Term	queryitem	querytotal		GO_acc	term_type	Term	queryitem	querytotal
GO:0008152	P	metabolic process	3383	5223		GO:0044237	P	cellular metabolic process	2910	5096
GO:0044237	P	cellular metabolic process	2967	5223		GO:0008152	P	metabolic process	3297	5096
GO:0009987	P	cellular process	3493	5223		GO:0009987	P	cellular process	3415	5096
GO:0044260	P	cellular macromolecule metabolic process	2081	5223		GO:0044260	P	cellular macromolecule metabolic process	2048	5096
GO:0043170	P	macromolecule metabolic process	2190	5223		GO:0043170	P	macromolecule metabolic process	2143	5096
GO:0009056	P	catabolic process	651	5223		GO:0009056	P	catabolic process	634	5096
GO:0051234	P	establishment of localization	844	5223		GO:0051234	P	establishment of localization	810	5096
GO:0006810	P	transport	838	5223		GO:0006810	P	transport	806	5096
GO:0051179	P	localization	861	5223		GO:0044249	P	cellular biosynthetic process	1566	5096
GO:0044249	P	cellular biosynthetic process	1604	5223		GO:0051179	P	localization	829	5096
GO:0009058	P	biosynthetic process	1670	5223		GO:0009058	P	biosynthetic process	1628	5096
GO:0044238	P	primary metabolic process	2356	5223		GO:0044238	P	primary metabolic process	2301	5096
GO:0019538	P	protein metabolic process	1172	5223		GO:0044267	P	cellular protein metabolic process	1058	5096
GO:0044267	P	cellular protein metabolic process	1066	5223		GO:0019538	P	protein metabolic process	1148	5096
GO:0006091	P	generation of precursor metabolites and energy	206	5223		GO:0006091	P	generation of precursor metabolites and energy	193	5096
GO:0034645	P	cellular macromolecule biosynthetic process	1119	5223		GO:0034645	P	cellular macromolecule biosynthetic process	1089	5096
GO:0009059	P	macromolecule biosynthetic process	1120	5223		GO:0009059	P	macromolecule biosynthetic process	1090	5096
GO:0006464	P	cellular protein modification process	570	5223		GO:0006464	P	cellular protein modification process	574	5096
GO:0050896	P	response to stimulus	1416	5223		GO:0050896	P	response to stimulus	1381	5096
GO:0015979	P	photosynthesis	116	5223		GO:0009628	P	response to abiotic stimulus	530	5096
GO:0009628	P	response to abiotic stimulus	537	5223		GO:0015979	P	photosynthesis	109	5096
GO:0008219	P	cell death	95	5223		GO:0008219	P	cell death	90	5096
GO:0009719	P	response to endogenous stimulus	443	5223		GO:0006950	P	response to stress	803	5096
GO:0006950	P	response to stress	810	5223		GO:0043412	P	macromolecule modification	606	5096
GO:0043412	P	macromolecule modification	603	5223		GO:0009719	P	response to endogenous stimulus	428	5096
GO:0005975	P	carbohydrate metabolic process	305	5223		GO:0005975	P	carbohydrate metabolic process	292	5096
GO:0007165	P	signal transduction	443	5223		GO:0007165	P	signal transduction	427	5096
GO:0009908	P	flower development	139	5223		GO:0007049	P	cell cycle	142	5096
GO:0007049	P	cell cycle	146	5223		GO:0009908	P	flower development	133	5096
GO:0019725	P	cellular homeostasis	90	5223		GO:0019725	P	cellular homeostasis	85	5096
GO:0006807	P	nitrogen compound metabolic process	1252	5223		GO:0006807	P	nitrogen compound metabolic process	1225	5096
GO:0007154	P	cell communication	472	5223		GO:0006629	P	lipid metabolic process	220	5096
GO:0006629	P	lipid metabolic process	224	5223		GO:0048856	P	anatomical structure development	633	5096
GO:0009653	P	anatomical structure morphogenesis	207	5223		GO:0009653	P	anatomical structure morphogenesis	204	5096
GO:0048856	P	anatomical structure development	638	5223		GO:0007154	P	cell communication	457	5096
GO:0009791	P	post-embryonic development	326	5223		GO:0032502	P	developmental process	638	5096
GO:0006259	P	DNA metabolic process	121	5223		GO:0009791	P	post-embryonic development	325	5096
GO:0016043	P	cellular component organization	494	5223		GO:0016043	P	cellular component organization	492	5096
GO:0032502	P	developmental process	642	5223		GO:0048608	P	reproductive structure development	262	5096
GO:0048608	P	reproductive structure development	263	5223		GO:0006259	P	DNA metabolic process	120	5096
GO:0009838	P	abscission	11	5223		GO:0009838	P	abscission	11	5096
GO:0090066	P	regulation of anatomical structure size	21	5223		GO:0009606	P	tropism	22	5096
GO:0032535	P	regulation of cellular component size	21	5223		GO:0006412	P	translation	294	5096
GO:0006412	P	translation	304	5223		GO:0009605	P	response to external stimulus	309	5096
GO:0042592	P	homeostatic process	117	5223		GO:0042592	P	homeostatic process	111	5096
GO:0009605	P	response to external stimulus	319	5223		GO:0007275	P	multicellular organism development	530	5096
GO:0009606	P	tropism	22	5223		GO:0090066	P	regulation of anatomical structure size	18	5096
GO:0009607	P	response to biotic stimulus	245	5223		GO:0032535	P	regulation of cellular component size	18	5096
GO:0022414	P	reproductive process	330	5223		GO:0032501	P	multicellular organismal process	569	5096
GO:0000003	P	reproduction	330	5223		GO:0022414	P	reproductive process	326	5096
GO:0007275	P	multicellular organism development	533	5223		GO:0000003	P	reproduction	326	5096
GO:0016049	P	cell growth	85	5223		GO:0003006	P	developmental process involved in reproduction	284	5096
GO:0003006	P	developmental process involved in reproduction	286	5223		GO:0009607	P	response to biotic stimulus	237	5096
GO:0032501	P	multicellular organismal process	571	5223		GO:0016049	P	cell growth	84	5096
GO:0048869	P	cellular developmental process	181	5223		GO:0048869	P	cellular developmental process	178	5096
GO:0051704	P	multi-organism process	294	5223		GO:0051704	P	multi-organism process	283	5096
GO:0009991	P	response to extracellular stimulus	33	5223		GO:0009991	P	response to extracellular stimulus	33	5096
GO:0019222	P	regulation of metabolic process	407	5223		GO:0019222	P	regulation of metabolic process	413	5096
GO:0030154	P	cell differentiation	129	5223		GO:0030154	P	cell differentiation	125	5096
GO:0009790	P	embryo development	93	5223		GO:0009790	P	embryo development	92	5096
GO:0010467	P	gene expression	698	5223		GO:0010467	P	gene expression	690	5096
GO:0050789	P	regulation of biological process	885	5223		GO:0050789	P	regulation of biological process	878	5096
GO:0040029	P	regulation of gene expression, epigenetic	29	5223		GO:0040029	P	regulation of gene expression, epigenetic	31	5096
GO:0065007	P	biological regulation	963	5223		GO:0065007	P	biological regulation	954	5096
GO:0040007	P	growth	104	5223		GO:0040007	P	growth	102	5096
GO:0065008	P	regulation of biological quality	212	5223		GO:0065008	P	regulation of biological quality	206	5096
GO:0010468	P	regulation of gene expression	315	5223		GO:0010468	P	regulation of gene expression	314	5096
GO:0006139	P	nucleobase-containing compound metabolic process	731	5223		GO:0006139	P	nucleobase-containing compound metabolic process	718	5096
GO:0060255	P	regulation of macromolecule metabolic process	377	5223		GO:0060255	P	regulation of macromolecule metabolic process	380	5096
GO:0050794	P	regulation of cellular process	777	5223		GO:0050794	P	regulation of cellular process	761	5096
GO:0019748	P	secondary metabolic process	72	5223		GO:0019748	P	secondary metabolic process	77	5096
GO:0009856	P	pollination	30	5223		GO:0009856	P	pollination	30	5096
GO:0005488	F	binding	3407	5223		GO:0005488	F	binding	3319	5096
GO:0003824	F	catalytic activity	2529	5223		GO:0003824	F	catalytic activity	2471	5096
GO:0005515	F	protein binding	1240	5223		GO:0005515	F	protein binding	1209	5096
GO:0000166	F	nucleotide binding	1097	5223		GO:0000166	F	nucleotide binding	1063	5096
GO:0060089	F	molecular transducer activity	184	5223		GO:0060089	F	molecular transducer activity	172	5096
GO:0004872	F	receptor activity	184	5223		GO:0004872	F	receptor activity	172	5096
GO:0016787	F	hydrolase activity	952	5223		GO:0016787	F	hydrolase activity	914	5096
GO:0016462	F	pyrophosphatase activity	345	5223		GO:0016462	F	pyrophosphatase activity	329	5096
GO:0016818	F	hydrolase activity on acid anhydrides, in phosphorus-containing anhydrides	345	5223		GO:0005198	F	structural molecule activity	252	5096
GO:0016817	F	hydrolase activity acting on acid anhydrides	346	5223		GO:0016818	F	hydrolase activity, acting on acid anhydrides, in phosphorus-containing anhydrides	329	5096
GO:0005198	F	structural molecule	261	5223		GO:0016817	F	hydrolase activity, acting on acid anhydrides	331	5096
GO:0017111	F	nucleoside-triphosphatase activity	325	5223		GO:0017111	F	nucleoside-triphosphatase activity	311	5096
GO:0005215	F	transporter activity	401	5223		GO:0005215	F	transporter activity	398	5096
GO:0016301	F	kinase activity	406	5223		GO:0016301	F	kinase activity	401	5096
GO:0016772	F	transferase activity transferring phosphorus-containing groups	441	5223		GO:0016740	F	transferase activity	885	5096
GO:0016740	F	transferase activity	887	5223		GO:0016772	F	transferase activity transferring phosphorus-containing groups	435	5096
GO:0003677	F	DNA binding	572	5223		GO:0003677	F	DNA binding	553	5096
GO:0016788	F	hydrolase activity acting on ester bonds	279	5223		GO:0016788	F	hydrolase activity, acting on ester bonds	285	5096
GO:0004871	F	signal transducer activity	101	5223		GO:0004871	F	signal transducer activity	101	5096
GO:0003676	F	nucleic acid binding	875	5223		GO:0003676	F	nucleic acid binding	859	5096
GO:0008135	F	translation factor activity, RNA binding	39	5223		GO:0008135	F	translation factor activity, RNA binding	36	5096
GO:0030234	F	enzyme regulator activity	68	5223		GO:0030234	F	enzyme regulator activity	66	5096
GO:0003774	F	motor activity	15	5223		GO:0003774	F	motor activity	16	5096
GO:0004518	F	nuclease activity	56	5223		GO:0004518	F	nuclease activity	56	5096
GO:0008289	F	lipid binding	49	5223		GO:0008289	F	lipid binding	47	5096
GO:0003723	F	RNA binding	295	5223		GO:0003723	F	RNA binding	295	5096
GO:0003682	F	chromatin binding	10	5223		GO:0003682	F	chromatin binding	8	5096
GO:0030246	F	carbohydrate binding	8	5223		GO:0030246	F	carbohydrate binding	7	5096
GO:0003700	F	transcription factor activity, sequence-specific DNA binding	263	5223		GO:0003700	F	transcription factor activity, sequence-specific DNA binding	250	5096
GO:0044464	C	cell part	3999	5223		GO:0005840	C	ribosome	272	5096
GO:0005623	C	cell	3999	5223		GO:0016020	C	membrane	2003	5096
GO:0005622	C	intracellular	3478	5223		GO:0043232	C	intracellular non-membrane-bounded organelle	517	5096
GO:0044424	C	intracellular part	3444	5223		GO:0043228	C	non-membrane-bounded organelle	517	5096
GO:0043226	C	organelle	3129	5223		GO:0032991	C	macromolecular complex	729	5096
GO:0043229	C	intracellular organelle	3125	5223		GO:0030529	C	intracellular non-membrane-bounded organelle	310	5096
GO:0043227	C	membrane-bounded organelle	2990	5223		GO:0009579	C	thylakoid	233	5096
GO:0043231	C	intracellular membrane-bounded orgenelle	2986	5223		GO:0030312	C	external encapsulating structure	244	5096
GO:0005737	C	cytoplasm	2482	5223		GO:0005618	C	cell wall	244	5096
GO:0044444	C	cytoplasmic part	2122	5223		GO:0005886	C	plasma membrane	873	5096
GO:0016020	C	membrane	2040	5223		GO:0005730	C	nucleolus	146	5096
GO:0005634	C	nucleus	1320	5223		GO:0009536	C	plastid	936	5096
GO:0044422	C	organelle part	1068	5223		GO:0031975	C	envelope	306	5096
GO:0044446	C	intracellular organelle part	1066	5223		GO:0044446	C	intracellular organelle part	1036	5096
GO:0009536	C	plastid	973	5223		GO:0044422	C	organelle part	1038	5096
GO:0005886	C	plasma membrane	879	5223		GO:0031967	C	organelle envelope	293	5096
GO:0032991	C	macromolecular complex	743	5223		GO:0031974	C	membrane-enclosed lumen	243	5096
GO:0043232	C	intracellular non-membrane-bounded organelle	524	5223		GO:0043233	C	organelle lumen	243	5096
GO:0043228	C	non-membrane-bounded organelle	524	5223		GO:0070013	C	intracellular organelle lumen	243	5096
GO:0005739	C	mitochondrion	461	5223		GO:0005773	C	vacuole	301	5096
GO:0005576	C	extracellular region	407	5223		GO:0005578	C	proteinaceous extracellular matrix	11	5096
GO:0005829	C	cytosol	375	5223		GO:0031981	C	nuclear lumen	185	5096
GO:0012505	C	endomembrane system	364	5223		GO:0005856	C	cytoskeleton	94	5096
GO:0030529	C	intracellular ribonucleoprotein complex	313	5223		GO:0044444	C	cytoplasmic part	2055	5096
GO:0005773	C	vacuole	311	5223		GO:0031012	C	extracellular matrix	14	5096
GO:0031975	C	envelope	305	5223		GO:0005777	C	peroxisome	60	5096
GO:0031967	C	organelle envelope	291	5223		GO:0042579	C	microbody	60	5096
GO:0005840	C	ribosome	278	5223		GO:0044428	C	nuclear part	222	5096
GO:0031974	C	membrane-enclosed lumen	253	5223		GO:0005783	C	endoplasmic reticulum	170	5096
GO:0043233	C	organelle lumen	253	5223		GO:0005829	C	cytosol	358	5096
GO:0070013	C	intracellular organelle lumen	253	5223		GO:0044421	C	extracellular region	25	5096
GO:0009579	C	thylakoid	248	5223		GO:0005737	C	cytoplasm	2402	5096
GO:0030312	C	external encapsulating structure	240	5223		GO:0005635	C	nuclear envelope	21	5096
GO:0005618	C	cell wall	240	5223		GO:0005794	C	Golgi apparatus	155	5096
GO:0044428	C	nuclear part	224	5223		GO:0043231	C	intracellular membrane-bounded organelle	2906	5096
GO:0031981	C	nuclear lumen	187	5223		GO:0044424	C	intracellular part	3352	5096
GO:0005783	C	endoplasmic reticulum	178	5223		GO:0043229	C	intracellular organelle	3044	5096
GO:0005794	C	Golgi appartus	159	5223		GO:0005622	C	intracellular	3384	5096
GO:0005730	C	nucleolus	147	5223		GO:0043227	C	membrane-bounded organelle	2910	5096
GO:0005856	C	cytoskeleton	98	5223		GO:0005654	C	nucleoplasm	37	5096
GO:0005777	C	peroxisome	67	5223		GO:0012505	C	endomembrane system	352	5096
GO:0042579	C	microbody	67	5223		GO:0000323	C	lytic vacuole	6	5096
GO:0005768	C	endosome	47	5223		GO:0005634	C	nucleus	1296	5096
GO:0005654	C	nucleoplasm	38	5223		GO:0005739	C	mitochondrion	458	5096
GO:0044421	C	extracellular region part	23	5223		GO:0044464	C	cell part	3907	5096
GO:0005635	C	nuclear envelope	20	5223		GO:0005623	C	cell	3907	5096
GO:0031012	C	extracellular matrix	13	5223		GO:0005615	C	extracellular space	11	5096
GO:0005615	C	extracellular space	10	5223		GO:0005764	C	lysosome	5	5096
GO:0005578	C	proteinaceous extracellular matrix	9	5223		GO:0005576	C	extracellular region	399	5096
GO:0000323	C	lytic vacuole	7	5223		GO:0043226	C	organelle	3048	5096
GO:0005764	C	lysosome	5	5223		GO:0005768	C	endosome	43	5096
